# Supplementary material
Source: HighWire-hosted journal article supplement (https://sti.bmj.com/content/93/2/129)
Supplement: inline-supplementary-material-1 [file inline-supplementary-material-1.pdf]

**Supplementary Table 1: Partnerships where sex occurred on only one occasion (to date) by Summary Partnership Type, Partnership Progression Type, and participant's gender**

|                                             | <i>Denominators<sup>1</sup><br/>(unweighted,<br/>weighted)</i> | % (95% CI) of partnerships where sex was reported only once |                            |                            |
|---------------------------------------------|----------------------------------------------------------------|-------------------------------------------------------------|----------------------------|----------------------------|
|                                             |                                                                | All                                                         | Men's partnerships         | Women's partnerships       |
| <b>All partnerships</b>                     | <b>14048, 13387</b>                                            | <b>11.0% (10.4%-11.6%)</b>                                  | <b>13.3% (12.4%-14.3%)</b> | <b>8.4% (7.7%-9.0%)</b>    |
| <b>Summary Partnership Type: Cohabiting</b> | <b>6493, 8008</b>                                              | <b>1.9% (1.6%-2.3%)</b>                                     | <b>2.1% (1.6%-2.7%)</b>    | <b>1.7% (1.3%-2.2%)</b>    |
| <i>Partnership Progression Type:</i>        |                                                                |                                                             |                            |                            |
| Living together    Living together          | 978, 1247                                                      | 12.1% (10.0%-14.5%)                                         | 14.0% (10.7%-18.2%)        | 10.3% (8.1%-13.2%)         |
| <b>Summary Partnership Type: Now steady</b> | <b>3816, 2635</b>                                              | <b>4.6% (3.9%-5.4%)</b>                                     | <b>5.4% (4.0%-6.4%)</b>    | <b>4.1% (3.3%-5.2%)</b>    |
| <i>Partnership Progression Type:</i>        |                                                                |                                                             |                            |                            |
| Steady    Steady                            | 1785, 1247                                                     | 9.7% (8.3%-11.4%)                                           | 11.1% (8.8%-14.0%)         | 8.4% (6.7%-10.4%)          |
| <b>Summary Partnership Type: Casual</b>     | <b>3111, 2339</b>                                              | <b>51.1% (49.1%-53.1%)</b>                                  | <b>53.7% (50.9%-56.4%)</b> | <b>46.7% (43.9%-49.6%)</b> |
| <i>Partnership Progression Type:</i>        |                                                                |                                                             |                            |                            |
| Known a while    Known a while              | 1662, 1263                                                     | 38.5% (35.9%-41.1%)                                         | 38.5% (34.9%-42.3%)        | 38.4% (34.8%-42.2%)        |
| Recently met    Recently met                | 817, 662                                                       | 57.2% (53.4%-61.0%)                                         | 59.5% (54.4%-64.3%)        | 53.1% (47.2%-58.9%)        |
| Just met    Just met                        | 444, 362                                                       | 91.2% (87.8%-93.7%)                                         | 91.1% (87.0%-94.0%)        | 91.7% (84.6%-95.7%)        |
| <b>Summary Partnership Type: Ex-steady</b>  | <b>449, 245</b>                                                | <b>N/A</b>                                                  | <b>N/A</b>                 | <b>N/A</b>                 |

**Note for Supplementary Table 1:**

<sup>1</sup> Denominators correspond to the number of partnerships (not participants).

**Supplementary Table 2: Distribution of different combinations of Summary Partnership Type(s) in the past year, by number of partners reported in detail and participant's gender**

| Number of partners reported in detail: | Denominators <sup>1</sup> (unweighted, weighted) | Combination of Summary Partnership Type(s): | All participants           | Men                      | Women                    |
|----------------------------------------|--------------------------------------------------|---------------------------------------------|----------------------------|--------------------------|--------------------------|
|                                        |                                                  |                                             | 11034, 11177<br>% (95% CI) | 4632, 5701<br>% (95% CI) | 6402, 5476<br>% (95% CI) |
| <b>1 partner</b>                       |                                                  |                                             |                            |                          |                          |
|                                        |                                                  | 1 cohabiting                                | 67.5% (66.5-68.5)          | 65.2% (63.6-66.7)        | 69.9% (68.6-71.1)        |
|                                        |                                                  | 1 now steady                                | 13.4% (12.8-14.0)          | 12.6% (11.7-13.5)        | 14.2% (13.3-15.1)        |
|                                        |                                                  | 1 ex-steady                                 | 1.3% (1.1-1.5)             | 1.0% (0.7-1.3)           | 1.7% (1.4-2.0)           |
|                                        |                                                  | 1 casual                                    | 3.7% (3.4-4.1)             | 4.8% (4.2-5.5)           | 2.6% (2.2-3.0)           |
| <b>2 partners</b>                      |                                                  |                                             |                            |                          |                          |
|                                        |                                                  | Both cohabiting                             | 0.3% (0.2-0.5)             | 0.4% (0.2-0.7)           | 0.2% (0.1-0.4)           |
|                                        |                                                  | 1 cohabiting & 1 now steady                 | 0.7% (0.5-0.9)             | 0.8% (0.5-1.3)           | 0.6% (0.4-0.8)           |
|                                        |                                                  | 1 cohabiting & 1 ex-steady                  | 0.1% (0.1-0.3)             | 0.2% (0.1-0.5)           | 0.1% (<0.1-0.2)          |
|                                        |                                                  | 1 cohabiting & 1 casual                     | 1.6% (1.3-1.9)             | 2.1% (1.6-2.6)           | 1.0% (0.8-1.4)           |
|                                        |                                                  | Both now steady                             | 1.1% (0.9-1.3)             | 1.1% (0.8-1.4)           | 1.1% (0.9-1.4)           |
|                                        |                                                  | 1 now steady & 1 ex-steady                  | 0.4% (0.3-0.5)             | 0.4% (0.2-0.6)           | 0.3% (0.2-0.5)           |
|                                        |                                                  | 1 now steady & 1 casual                     | 2.5% (2.3-2.9)             | 3.0% (2.5-3.5)           | 2.1% (1.8-2.5)           |
|                                        |                                                  | Both ex-steady                              | <0.1% (<0.1-0.1)           | 0.1% (<0.1-0.1)          | <0.1% (<0.1-0.1)         |
|                                        |                                                  | 1 ex-steady & 1 casual                      | 0.5% (0.4-0.7)             | 0.5% (0.3-0.7)           | 0.5% (0.4-0.7)           |
|                                        |                                                  | Both casual                                 | 1.2% (1.0-1.4)             | 1.5% (1.2-1.9)           | 0.8% (0.6-1.1)           |
| <b>3 partners</b>                      |                                                  |                                             |                            |                          |                          |
|                                        |                                                  | All 3 cohabiting                            | <0.1% (<0.1-0.2)           | <0.1% (<0.1-0.1)         | <0.1% (<0.1-0.3)         |
|                                        |                                                  | All 3 now steady                            | 0.2% (0.1-0.2)             | 0.2% (0.1-0.3)           | 0.1% (0.1-0.2)           |
|                                        |                                                  | All 3 casual                                | 1.3% (1.1-1.5)             | 1.7% (1.3-2.0)           | 0.9% (0.7-1.1)           |
|                                        |                                                  | 2 cohabiting & 1 now steady                 | <0.1% (<0.1-0.1)           | <0.1% (<0.1-0.2)         | 0                        |
|                                        |                                                  | 2 cohabiting & 1 ex-steady                  | <0.1% (<0.1-0.1)           | <0.1% (<0.1-0.2)         | 0                        |
|                                        |                                                  | 2 cohabiting & 1 casual                     | <0.1% (<0.1-0.1)           | <0.1% (<0.1-0.1)         | <0.1% (<0.1-0.1)         |
|                                        |                                                  | 2 now steady & 1 cohabiting                 | 0.1% (<0.1-0.1)            | <0.1% (<0.1-0.2)         | 0.1% (<0.1-<0.1)         |
|                                        |                                                  | 1 cohabiting, 1 now steady & 1 ex-steady    | <0.1% (<0.1-0.1)           | <0.1% (<0.1-0.2)         | 0.1% (<0.1-0.2)          |
|                                        |                                                  | 1 cohabiting, 1 now steady & 1 casual       | 0.3% (0.2-0.4)             | 0.2% (0.1-0.5)           | 0.3% (0.2-0.5)           |
|                                        |                                                  | 1 cohabiting, 1 ex-steady & 1 casual        | 0.1% (<0.1-0.1)            | 0.1% (<0.1-0.2)          | <0.1% (<0.1-0.1)         |
|                                        |                                                  | 2 casual & 1 cohabiting                     | 0.5% (0.4-0.7)             | 0.7% (0.4-1.1)           | 0.3% (0.2-0.5)           |
|                                        |                                                  | 2 now steady & 1 ex-steady                  | 0.1% (<0.1-0.1)            | <0.1% (<0.1-0.1)         | 0.1% (0.1-0.2)           |
|                                        |                                                  | 2 now steady & 1 casual                     | 0.7% (0.6-0.9)             | 0.8% (0.6-1.1)           | 0.7% (0.5-0.9)           |
|                                        |                                                  | 2 ex-steady & 1 now steady                  | <0.1% (<0.1-0.1)           | <0.1% (<0.1-0.1)         | <0.1% (<0.1-0.1)         |
|                                        |                                                  | 1 now steady, 1 ex-steady & 1 casual        | 0.4% (0.3-0.6)             | 0.5% (0.3-0.7)           | 0.4% (0.3-0.5)           |
|                                        |                                                  | 2 casual & 1 now steady                     | 1.5% (1.3-1.8)             | 1.7% (1.4-2.1)           | 1.4% (1.1-1.7)           |
|                                        |                                                  | 2 ex-steady & 1 casual                      | 0.1% (<0.1-0.1)            | <0.1% (<0.1-0.1)         | 0.1% (<0.1-0.2)          |
|                                        |                                                  | 2 casual & 1 ex-steady                      | 0.4% (0.3-0.5)             | 0.4% (0.3-0.6)           | 0.4% (0.3-0.6)           |
|                                        |                                                  | <i>Total:</i>                               | <i>100%</i>                | <i>100%</i>              | <i>100%</i>              |

**Note for Supplementary Table 2:**

<sup>1</sup> Denominators correspond to the number of participants (not partnerships).

**Supplementary Table 3A: Variations in reporting any STI diagnosis by combination of Summary Partnership Type(s), all in the past year: Men**

|                                                   |                                                        | <b>% reporting<br/>STI diagnosis<br/>(95% CI)</b> | <b>Crude OR<br/>(95% CI)</b> | <b>OR adjusted for<br/>age &amp; partner<br/>numbers, past year<br/>(95% CI)</b> | <i>Denominators<sup>1</sup><br/>unweighted/<br/>weighted</i> |
|---------------------------------------------------|--------------------------------------------------------|---------------------------------------------------|------------------------------|----------------------------------------------------------------------------------|--------------------------------------------------------------|
| <b>All</b>                                        |                                                        | 1.0% (0.7-1.3)                                    | -                            | -                                                                                | 4337, 5390                                                   |
| <b>Number of partners<br/>reported in detail:</b> | <b>Combination of<br/>Summary Partnership Type(s):</b> |                                                   |                              |                                                                                  |                                                              |
| <b>1 partner</b>                                  |                                                        |                                                   |                              |                                                                                  |                                                              |
|                                                   | Cohabiting                                             | 0.4% (0.3-0.8)                                    | 1.00                         | 1.00                                                                             | 2354, 3687                                                   |
|                                                   | Now steady                                             | 1.7% (0.9-3.2)                                    | 3.91 (1.69-9.04)             | 2.20 (0.80-6.07)                                                                 | 849, 708                                                     |
|                                                   | Ex-steady                                              | 0.0%                                              | N/A                          | N/A                                                                              | 70, 55                                                       |
|                                                   | Casual                                                 | 2.2% (0.9-5.3)                                    | 4.94 (1.67-14.6)             | 3.22 (1.01-10.3)                                                                 | 300, 275                                                     |
| <b>2 partners</b>                                 |                                                        |                                                   |                              |                                                                                  |                                                              |
|                                                   | Cohabiting & casual                                    | 0.8% (0.1-5.6)                                    | 1.82 (0.23-14.2)             | 1.38 (0.17-10.8)                                                                 | 82, 114                                                      |
|                                                   | Both now steady                                        | 1.8% (0.2-11.6)                                   | 4.03 (0.51-31.6)             | 2.12 (0.27-16.5)                                                                 | 74, 61                                                       |
|                                                   | Now steady & casual                                    | 2.1% (0.8-5.4)                                    | 4.80 (1.55-14.9)             | 2.22 (0.68-7.21)                                                                 | 200, 169                                                     |
|                                                   | Both casual                                            | 3.8% (1.5-9.6)                                    | 8.88 (2.86-27.6)             | 4.27 (1.18-15.5)                                                                 | 115, 86                                                      |
| <b>3 partners</b>                                 |                                                        |                                                   |                              |                                                                                  |                                                              |
|                                                   | All casual                                             | 3.2% (1.1-8.6)                                    | 7.33 (2.23-24.1)             | 2.71 (0.72-10.2)                                                                 | 114, 93                                                      |
|                                                   | 2 now steady & 1 casual                                | 0.9% (0.1-6.3)                                    | 2.06 (0.26-16.2)             | 0.88 (0.11-7.10)                                                                 | 59, 45                                                       |
|                                                   | 2 casual & 1 now steady                                | 6.0% (2.5-13.5)                                   | 14.2 (4.96-40.7)             | 6.03 (2.01-18.1)                                                                 | 120, 98                                                      |

**Note for Supplementary Table 3A:**

<sup>1</sup> Denominators correspond to the number of participants (not partnerships).

**Supplementary Table 3B: Variations in reporting any STI diagnosis by combination of Summary Partnership Type(s), all in the past year: Women**

|                                                   |                                                        | <b>% reporting<br/>STI diagnosis<br/>(95% CI)</b> | <b>Crude OR<br/>(95% CI)</b> | <b>OR adjusted for<br/>age &amp; partner<br/>numbers, past year<br/>(95% CI)</b> | <b>Denominators<sup>1</sup><br/>unweighted/<br/>weighted</b> |
|---------------------------------------------------|--------------------------------------------------------|---------------------------------------------------|------------------------------|----------------------------------------------------------------------------------|--------------------------------------------------------------|
| <b>All</b>                                        |                                                        | 1.0% (0.7%-1.2%)                                  | -                            |                                                                                  | 6119, 5309                                                   |
| <b>Number of partners<br/>reported in detail:</b> | <b>Combination of<br/>Summary Partnership Type(s):</b> |                                                   |                              |                                                                                  |                                                              |
| <b>1 partner</b>                                  |                                                        |                                                   |                              |                                                                                  |                                                              |
|                                                   | Cohabiting                                             | 0.3% (0.2%-0.5%)                                  | 1.00                         | 1.00                                                                             | 3646, 3808                                                   |
|                                                   | Now steady                                             | 1.8% (1.1%-2.9%)                                  | 6.31 (3.02-13.2)             | 2.18 (0.96-4.96)                                                                 | 1265, 775                                                    |
|                                                   | Ex-steady                                              | 0.0%                                              | N/A                          | N/A                                                                              | 157, 92                                                      |
|                                                   | Casual                                                 | 0.4% (0.1%-1.8%)                                  | 1.58 (0.35-7.03)             | 0.78 (0.17-3.60)                                                                 | 218, 142                                                     |
| <b>2 partners</b>                                 |                                                        |                                                   |                              |                                                                                  |                                                              |
|                                                   | Cohabiting & now steady                                | 6.1% (2.1%-16.5%)                                 | 22.8 (6.66-78.1)             | 8.10 (2.37-27.7)                                                                 | 54, 31                                                       |
|                                                   | Cohabiting & casual                                    | 3.1% (0.8%-11.9%)                                 | 11.4 (2.48-52.5)             | 6.73 (1.34-33.7)                                                                 | 74, 57                                                       |
|                                                   | Both now steady                                        | 3.4% (1.2%-9.4%)                                  | 12.6 (3.84-41.5)             | 3.49 (1.08-11.3)                                                                 | 113, 60                                                      |
|                                                   | Now steady & casual                                    | <b>4.2% (2.2%-8.2%)</b>                           | <b>15.7 (6.56-37.6)</b>      | <b>3.93 (1.56-9.93)</b>                                                          | <b>206, 115</b>                                              |
|                                                   | Ex-steady & casual                                     | 6.3% (2.0%-18.1%)                                 | 24.0 (6.78-84.9)             | 7.78 (2.27-26.7)                                                                 | 55, 29                                                       |
|                                                   | Both casual                                            | 4.8% (1.3%-15.7%)                                 | 17.8 (4.36-73.1)             | 5.71 (1.39-23.5)                                                                 | 63, 44                                                       |
| <b>3 partners</b>                                 |                                                        |                                                   |                              |                                                                                  |                                                              |
|                                                   | All casual                                             | 8.7% (3.8%-18.9%)                                 | 33.8 (12.0-95.3)             | 6.52 (2.05-20.7)                                                                 | 77, 47                                                       |
|                                                   | 2 now steady & 1 casual                                | 5.0% (1.7%-13.4%)                                 | 18.5 (5.54-61.9)             | 3.11 (0.72-13.4)                                                                 | 62, 36                                                       |
|                                                   | 2 casual & 1 now steady                                | 6.8% (3.2%-13.8%)                                 | 25.9 (10.1-66.2)             | 5.43 (1.92-15.3)                                                                 | 129, 74                                                      |

**Note for Supplementary Table 3B:**

<sup>1</sup> Denominators correspond to the number of participants (not partnerships).
